# Supplementary material for: Oral Health and Its Association with Systolic Blood Pressure Among Women in Rural Nepal: A Cross-Sectional Study
Source: Research Square preprint supplement (doi:10.21203/rs.3.rs-8114872/v1), 2025-12-22
Supplement: Supplementary file 1 [file fb4de0f429b27e5fa383bdcc.pdf]

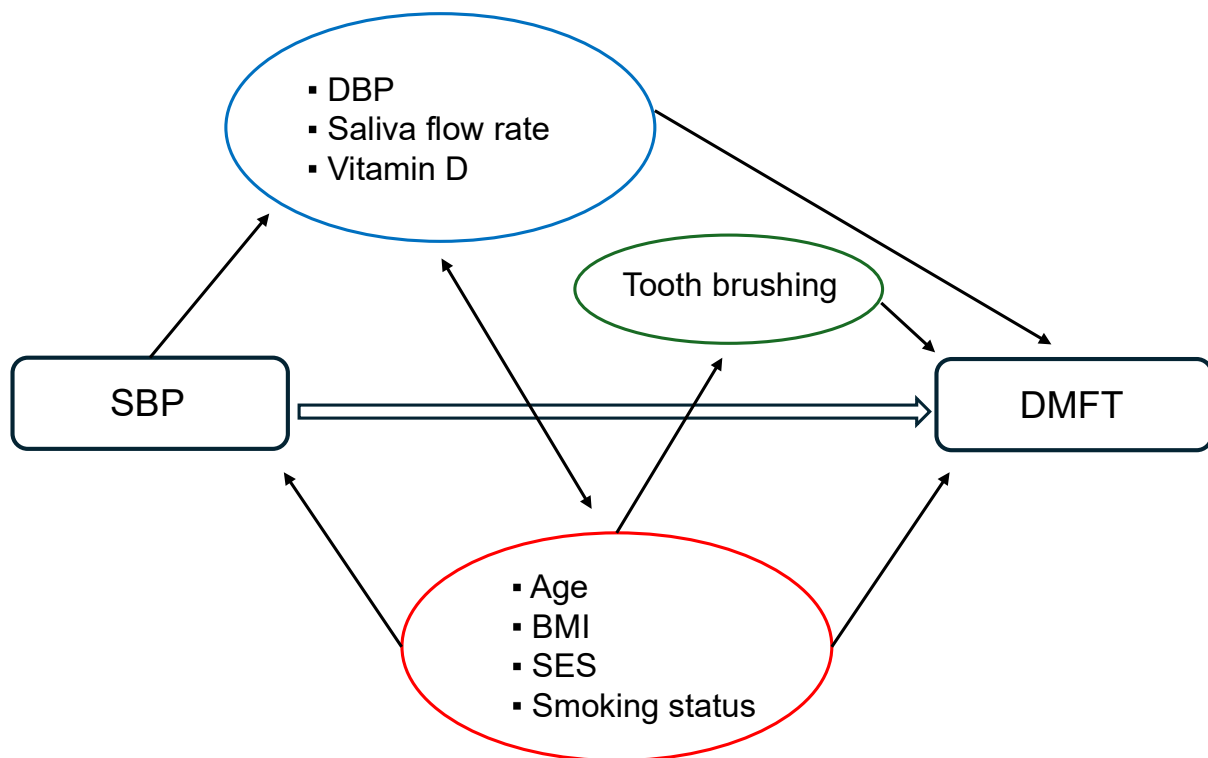

**Supplementary Figure 1.** Directed Acyclic Graph (DAG) model for Decayed, Missing and Filled Teeth (DMFT). Exposure: Systolic Blood Pressure (SBP) in mm Hg. Mediators (blue): Diastolic Blood Pressure (DBP) in mm Hg, Saliva Flow Rate in mL/minute and serum vitamin D (25(OH)D) in nmol/l, Confounders (red): Age in years, Body Mass Index (BMI) in kg/m<sup>2</sup>, Socioeconomic Status (SES) and Smoking status. Covariate (green): Tooth brushing frequency.

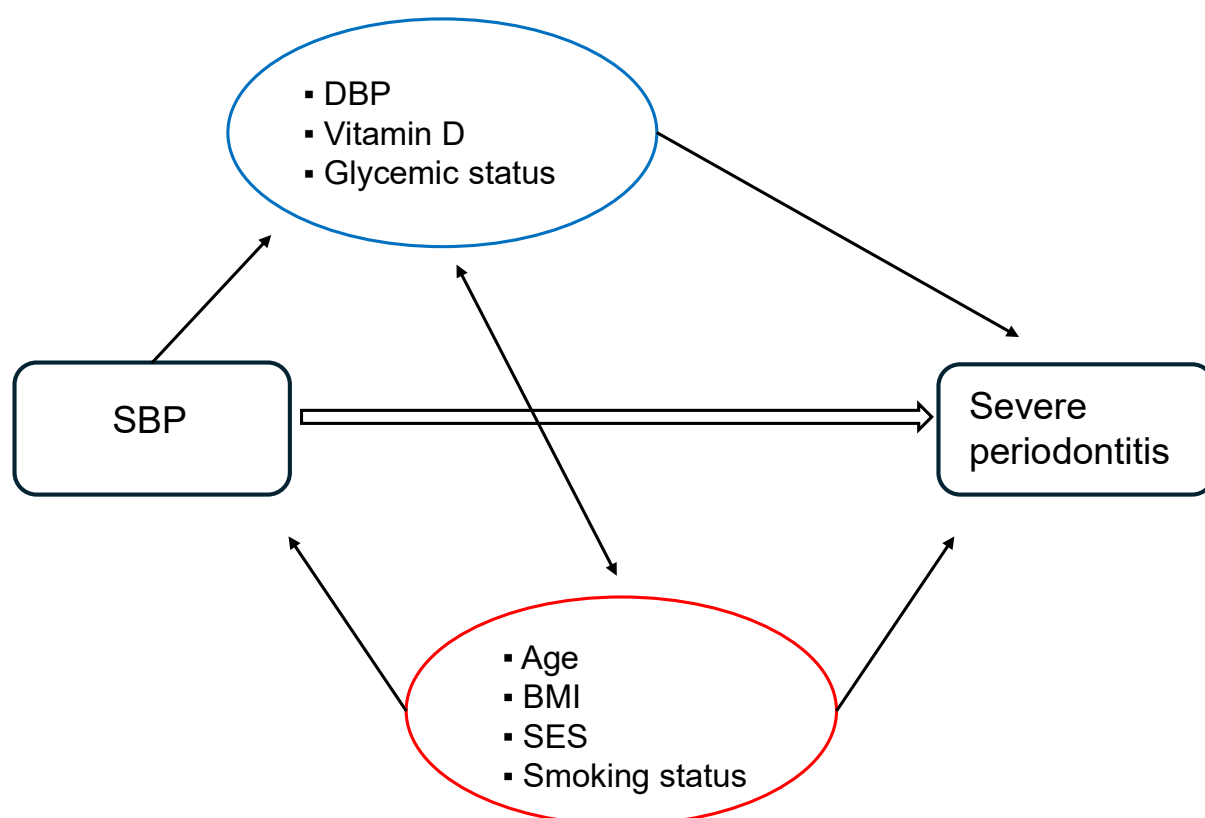

**Supplementary Figure 2.** Directed Acyclic Graph (DAG) model for Severe periodontitis. Exposure: Systolic Blood Pressure (SBP) in mm Hg. Mediators (blue): Diastolic Blood Pressure (DBP) in mm Hg, serum Vitamin D (25(OH)D) in nmol/l and glycemic status. Confounders (red): Age in years, Body Mass Index (BMI) in kg/m<sup>2</sup>, Socioeconomic Status (SES) and Smoking status.

**Supplementary Table 1: Clinical oral health characteristics**

|                           | <b>Total,<br/>N = 691</b> | <b>&lt; 35 yrs,<br/>N = 80</b> | <b>35–44 yrs,<br/>N = 183</b> | <b>45–54 yrs,<br/>N = 218</b> | <b>≥ 55 yrs,<br/>N = 210</b> |
|---------------------------|---------------------------|--------------------------------|-------------------------------|-------------------------------|------------------------------|
| <b>DMFT</b>               |                           |                                |                               |                               |                              |
| Mean ± SD                 | 5.07 ± 6.04               | 3.01 ± 4.52                    | 2.83 ± 4.14                   | 4.04 ± 4.55                   | 8.87 ± 7.38                  |
| Median (IQR)              | 3.0 (6.0)                 | 2.0 (4.0)                      | 1.0 (4.0)                     | 3.0 (6.0)                     | 7.0 (11.0)                   |
| <b>BOP</b>                |                           |                                |                               |                               |                              |
| Present in                | 564 [81.6]                | 68 [85]                        | 158 [86.3]                    | 188 [86.2]                    | 150 [71.4]                   |
| Mean ± SD                 | 7.89 ± 6.38               | 7.30 ± 5.30                    | 8.73 ± 6.68                   | 8.56 ± 6.57                   | 6.69 ± 6.14                  |
| Median (IQR)              | 7.0 (9.0)                 | 7.5 (8.0)                      | 8.0 (8.0)                     | 8.0 (8.0)                     | 6.0 (11.0)                   |
| Percentage of total teeth | 32.2 ± 26.1               | 28.9 ± 22.7                    | 33.5 ± 25.8                   | 34.0 ± 26.2                   | 30.5 ± 27.4                  |
| <b>Pockets 4–5 mm</b>     |                           |                                |                               |                               |                              |
| Present in                | 265 [38.4]                | 13 [16.2]                      | 56 [30.6]                     | 82 [37.6]                     | 114 [54.3]                   |
| Mean ± SD                 | 2.55 ± 4.49               | 0.78 ± 2.49                    | 1.73 ± 3.38                   | 2.50 ± 4.54                   | 4.00 ± 5.37                  |
| <b>Pockets ≥ 6 mm</b>     |                           |                                |                               |                               |                              |
| Present in                | 88 [12.7]                 | 6 [7.5]                        | 16 [8.7]                      | 20 [9.2]                      | 46 [21.9]                    |
| Mean ± SD                 | 0.49 ± 1.95               | 0.11 ± 0.50                    | 0.26 ± 1.57                   | 0.21 ± 0.89                   | 1.13 ± 2.99                  |

Data are in numbers [percentage], mean ± standard deviation or median (interquartile range)

BOP = Bleeding on Probing

**Supplementary Table 2: Variables stratified by Decayed, Missing and Filled Teeth (DMFT) status**

| DMFT index                                 | Total<br>N = 691 | Low to moderate DMFT*<br>N = 607 | High DMFT*<br>N = 84 |
|--------------------------------------------|------------------|----------------------------------|----------------------|
| <b>SBP, mm Hg</b>                          | 126.3 ± 19.1     | 125.8 ± 18.6                     | 130.2 ± 21.9         |
| <b>DBP, mm Hg</b>                          | 82.0 ± 10.7      | 82.1 ± 10.6                      | 81.3 ± 10.8          |
| <b>BP status**</b>                         |                  |                                  |                      |
| Normal to elevated                         | 485 [70.2]       | 432 [71.2]                       | 53 [63.1]            |
| Hypertension                               | 206 [29.8]       | 175 [28.8]                       | 31 [36.9]            |
| <b>Age, yrs</b>                            | 48.4 ± 11.7      | 47.2 ± 11.0                      | 57.5 ± 12.4          |
| <b>BMI, kg/m<sup>2</sup>, <sup>a</sup></b> | 24.8 ± 4.3       | 24.9 ± 4.2                       | 23.7 ± 5.0           |
| <b>SES</b>                                 |                  |                                  |                      |
| Middle                                     | 144 [20.8]       | 124 [20.4]                       | 20 [23.8]            |
| Low                                        | 510 [73.8]       | 457 [75.3]                       | 53 [63.1]            |
| Missing                                    | 37 [5.4]         | 26 [4.3]                         | 11 [13.1]            |
| <b>Smoking status</b>                      |                  |                                  |                      |
| Never                                      | 448 [64.8]       | 396 [65.2]                       | 52 [61.9]            |
| Previous                                   | 106 [15.3]       | 92 [15.2]                        | 14 [16.7]            |
| Current                                    | 136 [19.7]       | 118 [19.4]                       | 18 [21.4]            |
| Missing                                    | 1 [0.1]          | 1 [0.2]                          | -                    |
| <b>Tooth brushing frequency</b>            |                  |                                  |                      |
| ≥ once/day                                 | 30 [4.4]         | 450 [74.2]                       | 47 [56.0]            |
| < once/day                                 | 467 [67.6]       | 155 [25.5]                       | 34 [40.5]            |
| Missing                                    | 5 [0.7]          | 2 [0.3]                          | 3 [3.6]              |
| <b>s25(OH)D, nmol/L<sup>b</sup></b>        | 52.3 ± 15.5      | 52.6 ± 14.7                      | 49.9 ± 20.2          |
| <b>UWSFR, mL/minute<sup>c</sup></b>        | 0.51 ± 0.30      | 0.51 ± 0.29                      | 0.47 ± 0.34          |

Data are as mean ± standard deviation or number [%]

\*DMFT = Decayed, Missing and Filled Teeth, Low to moderate: DMFT ≤ 13.9 and High: DMFT > 13.9

SBP/DBP = Systolic/Diastolic Blood Pressure, BMI = Body Mass Index, SES = Socioeconomic Status

s = serum, UWSFR = Unstimulated Whole Salivary Flow Rate

\*\*Blood pressure status, Hypertension: SBP ≥ 140 mmHg and/or DBP ≥ 90 mm Hg and/or use BP medication

<sup>a</sup>missing data from N = 3

<sup>b</sup>missing data from N = 30

<sup>c</sup>missing data from N = 41

**Supplementary Table 3: Variables stratified by periodontal status**

|                                            | Total<br>N = 691 | No or mild to<br>moderate periodontitis<br>N = 603 | Severe periodontitis*<br>N = 88 |
|--------------------------------------------|------------------|----------------------------------------------------|---------------------------------|
| <b>SBP, mm Hg</b>                          | 126.3 ± 19.1     | 125.7 ± 18.6                                       | 130. ± 21.9                     |
| <b>DBP, mm Hg</b>                          | 82.0 ± 10.7      | 81.8 ± 10.7                                        | 83.3 ± 11.0                     |
| <b>BP status**</b>                         |                  |                                                    |                                 |
| Normal to elevated                         | 485 [70.2]       | 426 [70.6]                                         | 59 [67.0]                       |
| Hypertension                               | 206 [29.8]       | 177 [29.4]                                         | 29 [33.0]                       |
| <b>Age, yrs</b>                            | 48.4 ± 11.7      | 47.6 ± 11.3                                        | 54.2 ± 12.5                     |
| <b>BMI, kg/m<sup>2</sup>, <sup>a</sup></b> | 24.8 ± 4.3       | 25.0 ± 4.3                                         | 23.5 ± 4.0                      |
| <b>Smoking status</b>                      |                  |                                                    |                                 |
| Never                                      | 448 [64.8]       | 402 [66.6]                                         | 46 [52.3]                       |
| Previous                                   | 106 [15.3]       | 92 [15.3]                                          | 14 [15.9]                       |
| Current                                    | 136 [19.7]       | 108 [17.9]                                         | 28 [31.8]                       |
| Missing                                    | 1 [0.1]          | 1 [0.2]                                            | -                               |
| <b>SES</b>                                 |                  |                                                    |                                 |
| Middle                                     | 144 [20.8]       | 117 [19.4]                                         | 27 [30.7]                       |
| Low                                        | 510 [73.8]       | 454 [75.3]                                         | 56 [63.6]                       |
| Missing                                    | 37 [5.4]         | 32 [5.3]                                           | 5 [5.7]                         |
| <b>s25(OH)D, nmol/L<sup>b</sup></b>        | 52.3 ± 15.5      | 52.6 ± 14.9                                        | 50.3 ± 19.5                     |
| <b>Glycemic status***</b>                  |                  |                                                    |                                 |
| Normal                                     | 400 [57.9]       | 358 [59.4]                                         | 42 [47.8]                       |
| Pre-diabetes                               | 223 [32.3]       | 187 [31.0]                                         | 36 [40.9]                       |
| Diabetes                                   | 48 [6.9]         | 39 [6.5]                                           | 9 [10.2]                        |
| Missing                                    | 20 [2.9]         | 19 [3.2]                                           | 1 [1.1]                         |

Data are in mean ± standard deviation or number [%]

SBP/DBP = Systolic/Diastolic Blood Pressure, BMI = Body Mass Index, SES = Socioeconomic Status, s = serum

\*Severe periodontitis: ≥ 2 pockets 4–5 mm and ≥ 1 pocket ≥ 6 mm

\*\*Blood pressure status, Hypertension: SBP ≥ 140 mmHg and/or DBP ≥ 90 mm Hg and/or use BP medication

\*\*\*Glycemic status, Normal: HbA1c < 39 mmol/mol, Pre-diabetes: HbA1c ≥ 39 to < 48 mmol/mol, Diabetes: diabetes history/medication/HbA1c ≥ 48 mmol/mol.

<sup>a</sup>missing data from N = 3

<sup>b</sup>missing data from N = 30
